# Supplementary material
Source: publisher site journal article supplement (http://www.spandidos-publications.com/6211/downloadSupplementary)
Supplement: Supplementary file 1 [file downloadSupplementary]

## Sheet: Sheet1
Table SII. Base sequences of the forward and backward primers for the hub gene.
Gene	Primer direction	Sequence (5'-3')
GJA1	Forward	GCTCCACTCTCGCCTATGTC
	Backward	AGTTGGAGATGGTGCTTCCG
CYBB	Forward	TGCCAGTGTGTCGGAATCTC
	Backward	TGTGAATGGCCGTGTGAAGT
TIMP1	Forward	TGTGGGAAATGCCACAGGTT
	Backward	AGCAGGGCTCAGATTATGCC
SNCA	Forward	AGGGAGTCGTTCATGGAGTG
	Backward	CAGGCATGTCTTCCAGGATTC
CDKN1A	Forward	GTCCGATCCTGGTGATGTCC
	Backward	GCGAAGTCAAAGTTCCACCG
SLC40A1	Forward	GATCGGATGTGGCACTTTGC
	Backward	GCTGTCAAGAGGAGGCTGTT
SCD	Forward	GCCACAGGACTTACAAGGCT
	Backward	CTTTGACAGCCGGGTGTTTG
ACTB	Forward	AGATGACCCAGATCATGTTTGAGA
	Backward	CGCTCGGTCAGGATCTTCAT
